# Supplementary material for: Light-controlled reversible formation and dissociation of nanorods via interconversion of pseudorotaxanes
Source: Royal Society of Chemistry journal article supplement (doi:10.1039/c5cc01372k), 2015-01-01
Supplement: c5cc01372k1.pdf [file c5cc01372k1.pdf]

## Electronic Supplementary Information

for

### **Light-Controlled Reversible Formation and Dissociation of Nanorods via Interconversion of Pseudorotaxanes**

Jun Wang,<sup>a</sup> Heng-Yi Zhang,<sup>\*a</sup> Xu-Jie Zhang,<sup>a</sup> Zhi-Hui Song,<sup>a</sup> Xiao-Jun Zhao<sup>\*b</sup> and  
Yu Liu<sup>\*a</sup>

<sup>a</sup> Department of Chemistry, State Key Laboratory of Elemento-Organic Chemistry,  
Nankai University, Collaborative Innovation Center of Chemical Science and  
Engineering, Tianjin 300071, P. R. China. Email: [hyzhang@nankai.edu.cn](mailto:hyzhang@nankai.edu.cn),  
[yuliu@nankai.edu.cn](mailto:yuliu@nankai.edu.cn)

<sup>b</sup>Tianjin Normal University, Collaborative Innovation Center of Chemical Science  
and Engineering, Tianjin 300072, P. R. China. Email: [hsxyzxj@mail.tjnu.edu.cn](mailto:hsxyzxj@mail.tjnu.edu.cn)

## Contents

|                                                                                                                                             |     |
|---------------------------------------------------------------------------------------------------------------------------------------------|-----|
| <b>Experimental section</b> .....                                                                                                           | S3  |
| <b>Fig. S1-S3.</b> Characterization of DNDS.....                                                                                            | S6  |
| <b>Fig. S4.</b> $^1\text{H}$ ROESY of <b>2</b> $\subset$ <b>1</b> .....                                                                     | S6  |
| <b>Fig. S5.</b> Job's plot of <b>1</b> with <b>2</b> .....                                                                                  | S7  |
| <b>Fig. S6.</b> ESI-MS spectrum of <b>2</b> $\subset$ <b>1</b> .....                                                                        | S7  |
| <b>Fig. S7.</b> absorption spectra and optical transmittance of <b>1</b> .....                                                              | S8  |
| <b>Fig. S8.</b> absorption spectra and optical transmittance of <b>2</b> .....                                                              | S8  |
| <b>Fig. S9.</b> Detection of host <b>1</b> -induced CAC of guest <b>2</b> .....                                                             | S9  |
| <b>Fig. S10.</b> Optical transmittance of <b>2</b> with <b>1</b> and building block.....                                                    | S9  |
| <b>Fig. S11.</b> Zeta Potential of nanorods.....                                                                                            | S10 |
| <b>Fig. S12.</b> $^1\text{H}$ ROESY of <b>2</b> $\subset$ <b>1</b> $\cdot\alpha$ -CD.....                                                   | S11 |
| <b>Fig. S13.</b> ESI-MS spectrum of <b>2</b> $\subset$ <b>1</b> $\cdot\alpha$ -CD.....                                                      | S11 |
| <b>Fig. S14.</b> TEM image of <b>2</b> $\subset$ <b>1</b> $\cdot\alpha$ -CD.....                                                            | S12 |
| <b>Fig. S15.</b> Absorption spectra of <b>3</b> $\subset\alpha$ -CD.....                                                                    | S12 |
| <b>Fig. S16.</b> Circular dichroism change of <b>3</b> $\subset\alpha$ -CD upon Vis/UV irradiation.....                                     | S13 |
| <b>Fig. S17.</b> Circular dichroism spectra of different mixture solution.....                                                              | S13 |
| <b>Fig. S18.</b> Controlling TEM images.....                                                                                                | S14 |
| <b>Fig. S19.</b> Absorption spectra of <b>3</b> with <b>2</b> $\subset$ <b>1</b> $\cdot\alpha$ -CD upon Vis/UV irradiation.....             | S14 |
| <b>Fig. S20.</b> Circular dichroism change of <b>3</b> with <b>2</b> $\subset$ <b>1</b> $\cdot\alpha$ -CD upon Vis/UV irradiation.<br>..... | S15 |

## **Experimental Section**

**General Method.** All chemicals were commercially available and were used without further purification unless noted otherwise. Compounds **1**, **2** and **3** were synthesized according to the previous reports.<sup>1,2,3</sup> The synthesis of 4,8-dimethoxy-naphthalene-1,5-disulfonate sodium (DNDS) was described in the following, and it was identified by NMR spectroscopy in D<sub>2</sub>O, performed on a Varian 400 spectrometer, mass spectrometry, performed on an IonSpec QFT-ESI MS, which were listed in Figures **S1–S3**, respectively. RPMI-1640 culture solution purchased Gibco company and the HGC-27 gastric cells were provided by Beijing tumor biology test center.

### **Preparation of stocks solution**

A predetermined amount of **1**, **2**, **3** and  $\alpha$ -CD were dissolved in aqueous phosphate-buffered saline (PBS) buffer to gain 1 mM stock solutions. Corresponding bulk of the above stock solutions were mixed for each measurement.

### **UV-Vis Spectra and Optical Transmittance**

UV-Vis spectra and optical transmittance were recorded in a quartz cell (light path 10 mm) on a Shimadzu UV-3600 spectrophotometer equipped with a PTC-348WI temperature controller.

### **TEM and SEM Experiments**

TEM images were recorded on a Philips Tecnai G2 20S-TWIN microscope operating at an accelerating voltage of 200 keV. The sample for TEM measurements was prepared by dropping the solution onto a copper grid. The grid was then air-dried. SEM images were recorded on a Hitachi S-3500N scanning electron microscope. The

sample for SEM measurements was prepared by dropping the solution onto a coverslip, followed by evaporating the liquid in air.

### **Zeta Potential measurements**

Zeta Potential experiment was carried out on a Zetasizer Nano ZS from Brookhaven Instruments equipped with a 10 mW HeNe laser at a wavelength of 633 nm.

**Synthesis of 4,8-dimethoxy-naphthalene-1,5-disulfonate sodium (DNDS).** We have synthesized host **1** building subunit according our previous article.<sup>S1</sup> The process of synthesis was as follows: 2.33 g (20.00 mmol) chlorosulfonic acid was added dropwise over a period of 2 h to a stirred solution of 1,5-dimethoxynaphthalene (0.38 g, 2 mmol) in dry 150 mL CHCl<sub>3</sub> at -5 °C. After additional 4 h reaction at -5 °C, a white precipitate was obtained. The precipitate was carefully collected by filtration and washed with 50 mL dry CHCl<sub>3</sub> at once. The residue was taken up into 100 mL H<sub>2</sub>O, and 5% NaOH solution was added until pH = 7. The solvate was envapoured and the residue was recrystallized from acetonitrile-acetone for three times and dried by vacuum, the target compound was obtained as white solid (731 mg, 91%).

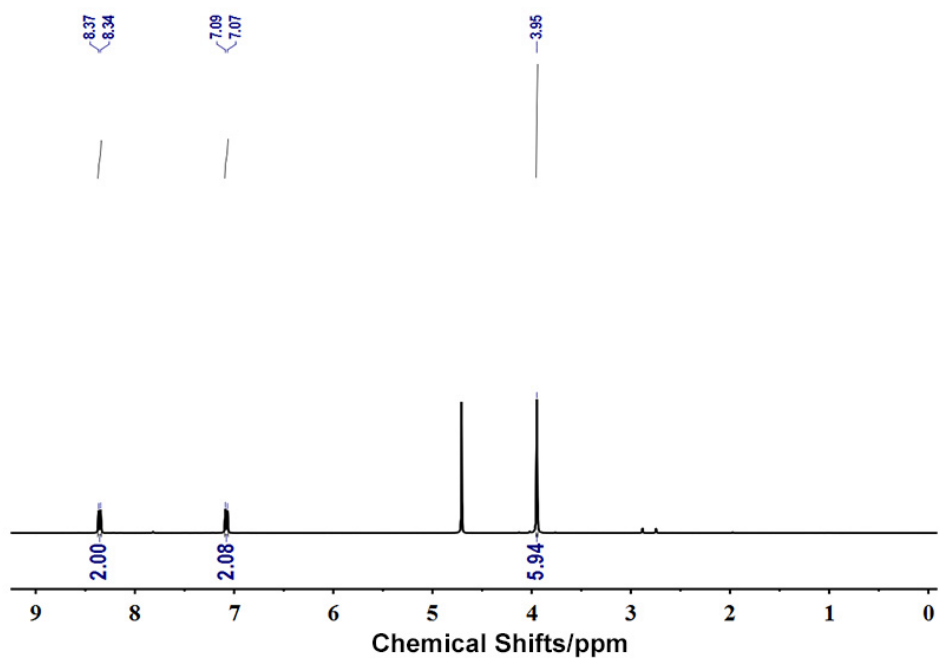

**Fig. S1.**  $^1\text{H}$  NMR spectrum (400 MHz,  $\text{D}_2\text{O}$ , 25  $^\circ\text{C}$ ) of DNDS.

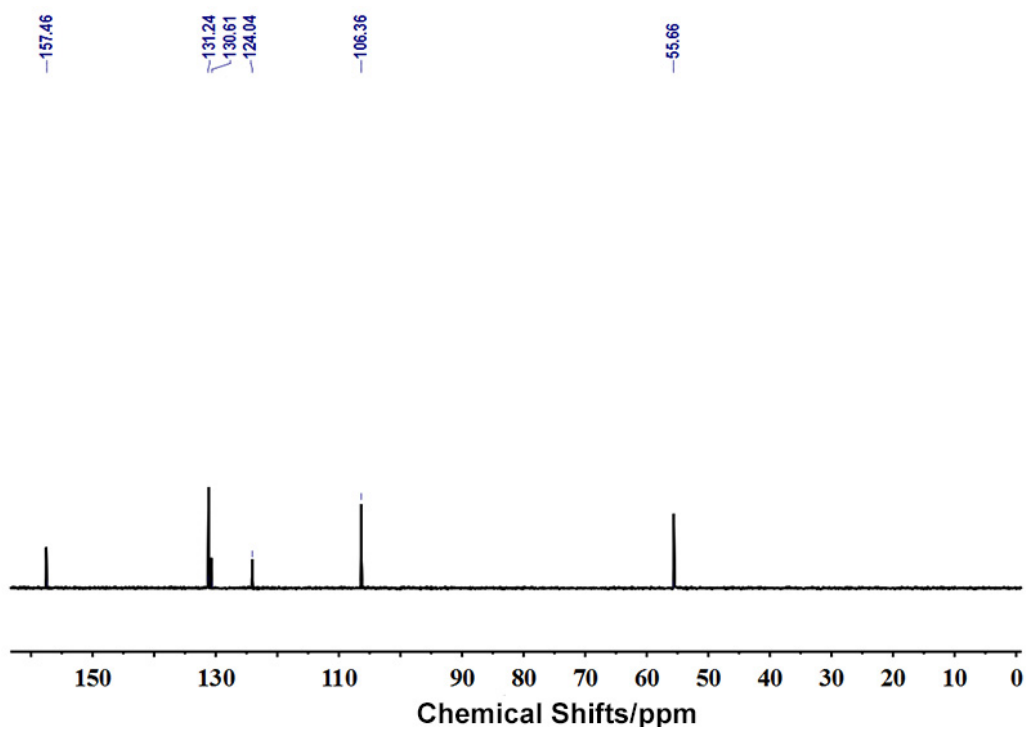

**Fig. S2.**  $^{13}\text{C}$  NMR spectrum (100 MHz,  $\text{D}_2\text{O}$ , 25  $^\circ\text{C}$ ) of DNDS.

| Sample Name  | lc/ms    | Position    | P1-A3     | Instrument Name | Instrument 1 | User Name              |                     |
|--------------|----------|-------------|-----------|-----------------|--------------|------------------------|---------------------|
| j Vol        | 2        | InjPosition | chen-ms.m | SampleType      | Sample       | IRM Calibration Status | Some Ions Missed    |
| sta Filename | WJ-416.d | ACQ Method  | chen-ms.m | Comment         |              | Acquired Time          | 7/26/2013 4:12:09 F |

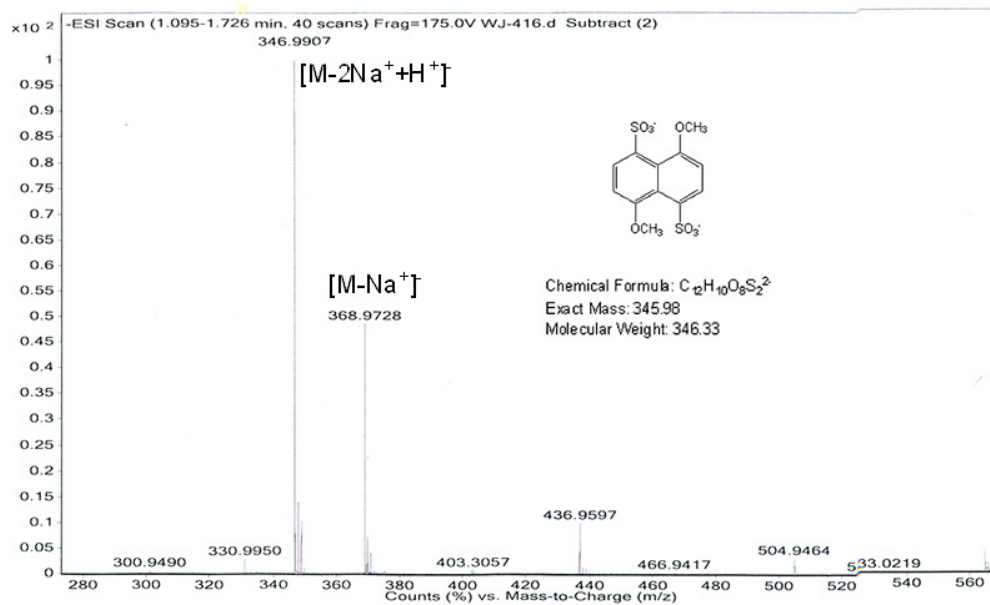

Fig. S3. ESI-HRMS spectrum of DNDS.

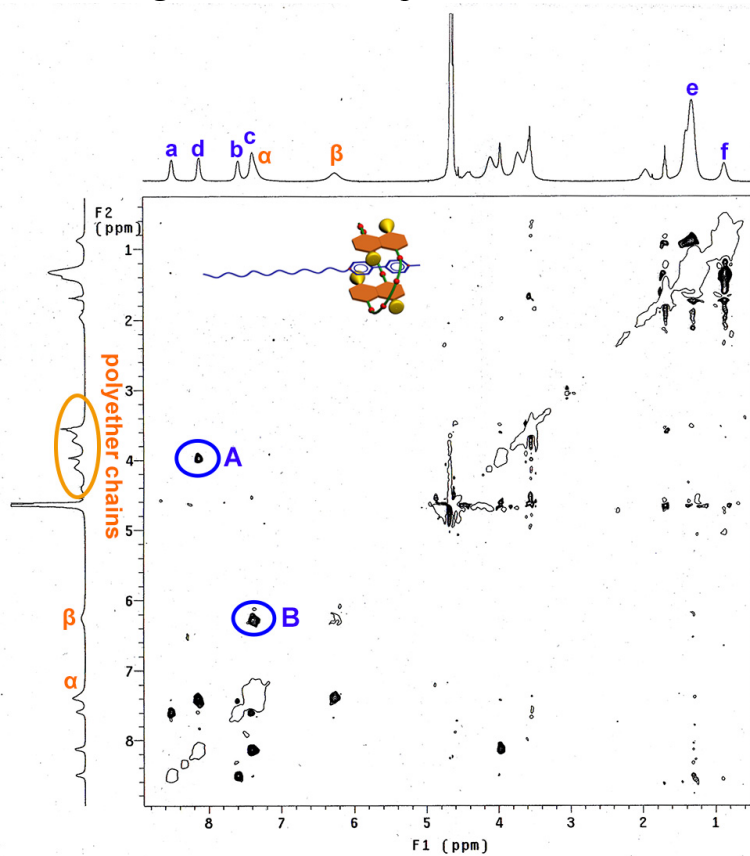

Fig. S4.  $^1H$  ROESY spectrum of [2]pseudorotaxane **2c1** in  $D_2O$  at  $25\text{ }^\circ C$ .

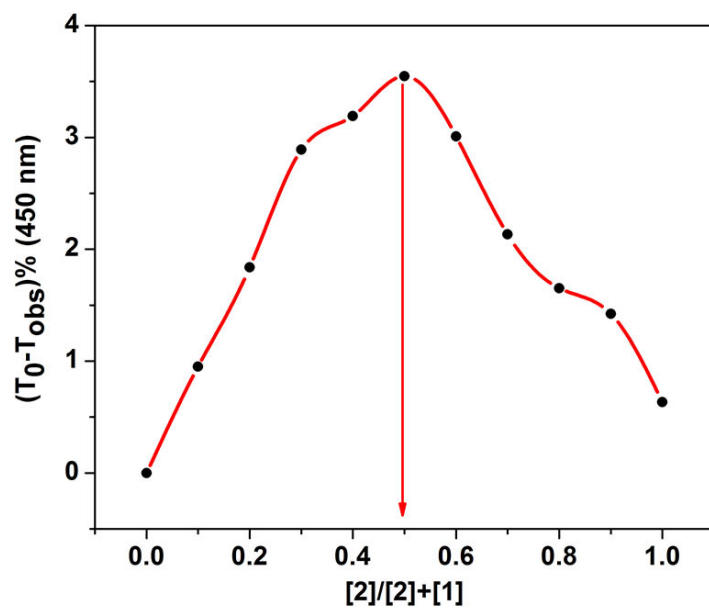

**Fig. S5.** Job's plot of [2]pseudorotaxane **2c1** at total concentration of 0.01 mM at 25 °C.

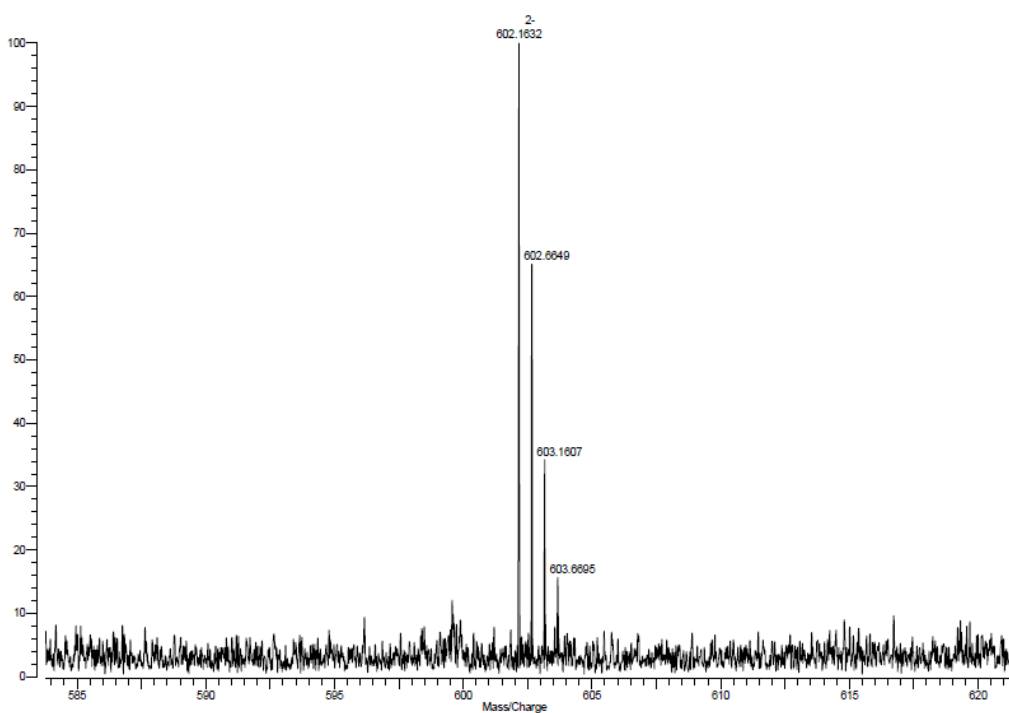

**Fig. S6.** ESI-MS spectrum of [2]pseudorotaxane **2c1**. The peak at  $m/z$  602.1632 is assigned to  $[1 + 2]^{2-}$ , calcd.: 602.1624.

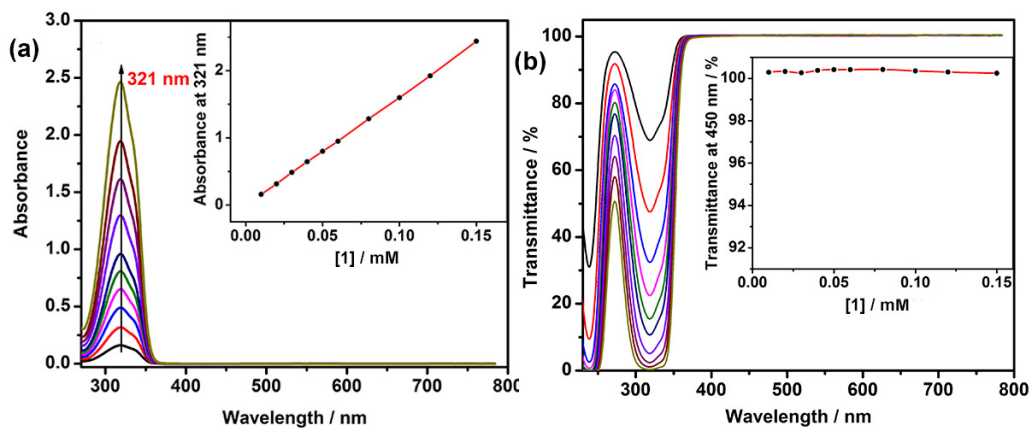

**Fig. S7.** UV-Vis absorption spectra (a) and optical transmittance (b) of host **1** at different concentrations (from 0.01 mM to 0.15 mM) at 25 °C in water. Inset: dependence of (a) the absorbance at 321 nm and (b) optical transmittance at 450 nm on **1** concentration, respectively.

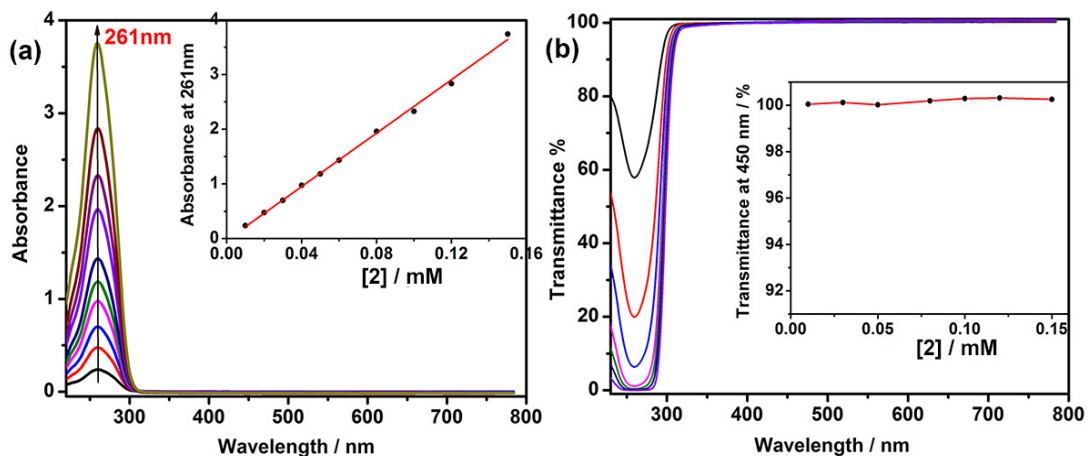

**Fig. S8.** UV-Vis absorption spectra (a) and optical transmittance (b) of guest **2** at different concentrations from 0.01 mM to 0.15 mM at 25 °C. Inset: dependence of the absorption at 261 nm (a) and optical transmittance at 450 nm on **2** concentration, respectively.

It should be noted that there was no obvious changes at longer wavelength region, and good linear relationship between absorbance or optical transmittance and the  $1/2$  concentration from 0.01 to 0.15 mM, indicating that free  $1/2$  was without any self-



aggregation behaviors under the concentration conditions.

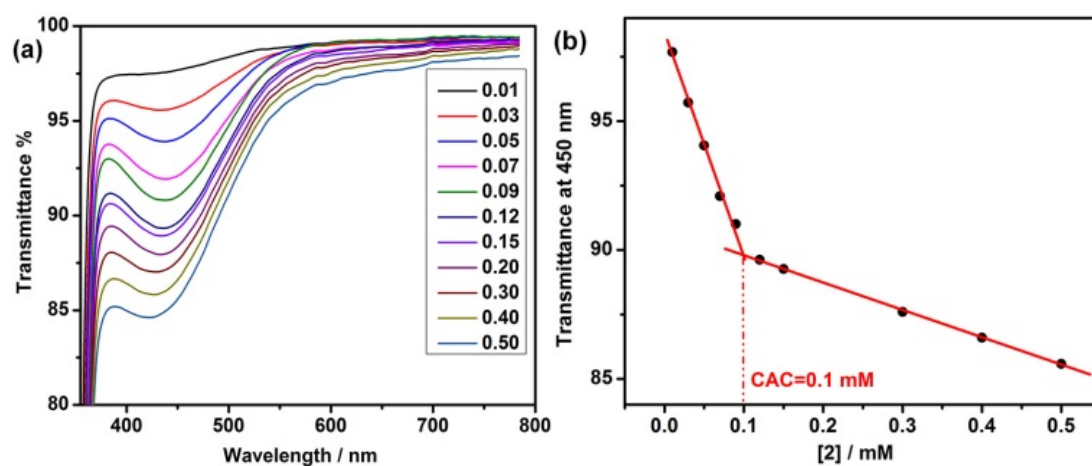

**Fig. S9.** (a) Dependence of the optical transmittance at 25 °C on **2** concentration in the presence of 0.1 mM **1**; (b) The corresponding CAC was determined to be 0.1 mM.

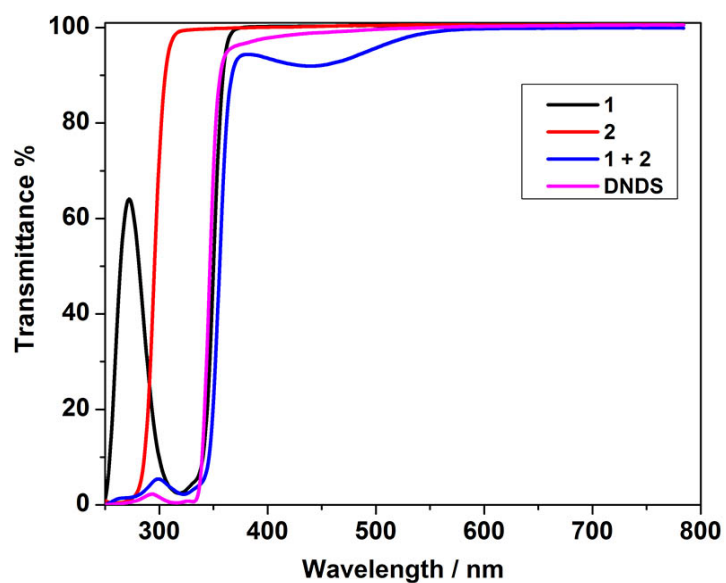

**Fig. S10.** Optical transmittance of **1**, **2**, **1 + 2** and **2 + DNDS** at 25 °C in water; [**1**] = 0.1 mM, [**2**] = 0.1 mM, [DNDS] = 0.20 mM, respectively.

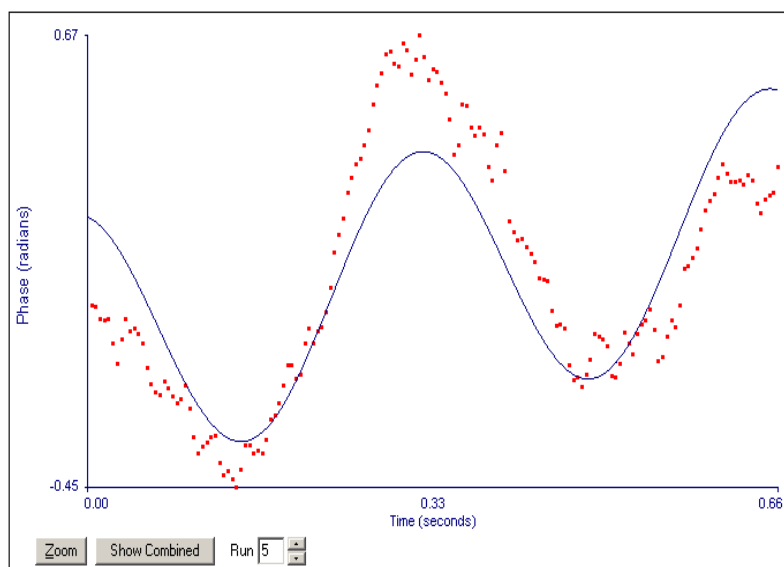

| Run        | Mobility | Zeta Potential (mV) | Rel. Residual | Measurement Parameters:      |
|------------|----------|---------------------|---------------|------------------------------|
| 1          | -0.73    | -9.33               | 0.0087        | Conductance = 133 $\mu$ S    |
| 2          | -0.76    | -9.75               | 0.0141        | Current = 0.28 mA            |
| 3          | -0.66    | -8.42               | 0.0077        | Electric Field = 5.24 V/cm   |
| 4          | -0.75    | -9.56               | 0.0065        | Sample Count Rate = 965 kcps |
| 5          | -0.55    | -7.00               | 0.0122        | Ref. Count Rate = 1933 kcps  |
|            |          |                     |               | Uncorrected Temp. = 25.5 °C  |
| Mean       | -0.69    | -8.81               | 0.0098        |                              |
| Std. Error | 0.04     | 0.51                | 0.0014        |                              |
| Combined   | -0.68    | -8.69               | 0.0057        |                              |

**Fig. S11.** Zeta Potential of [2]pseudorotaxane 2C1 nanorods, [1] = [2] = 0.1 mM.

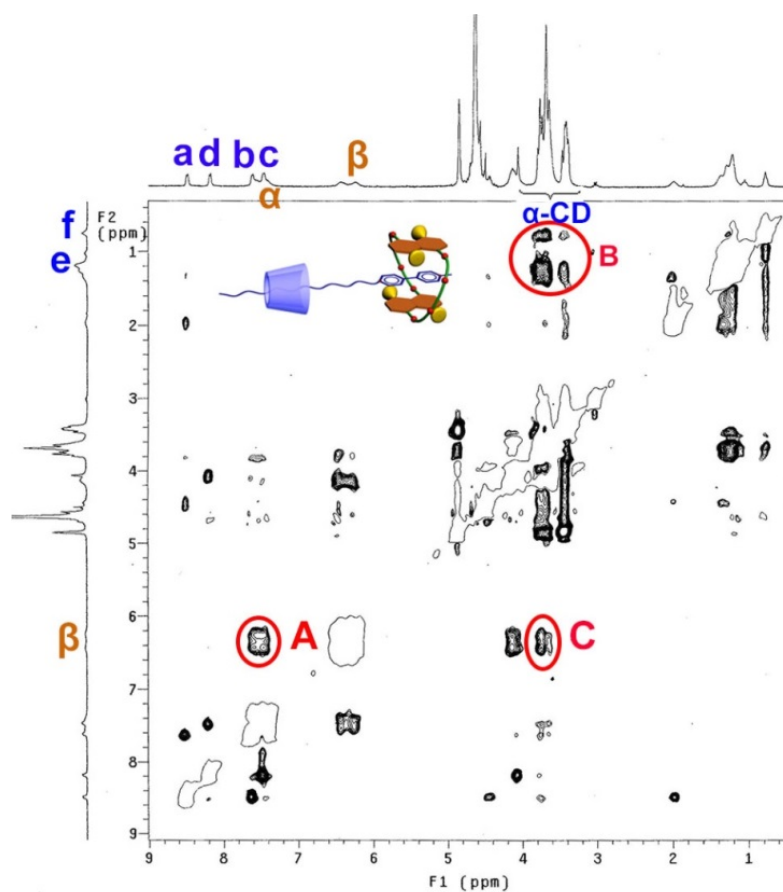

**Fig. S12.**  $^1\text{H}$  ROESY spectrum of  $[3]\text{pseudorotaxane } 2\text{C}1 \cdot \alpha\text{-CD}$  in  $\text{D}_2\text{O}$  at  $25\text{ }^\circ\text{C}$ .

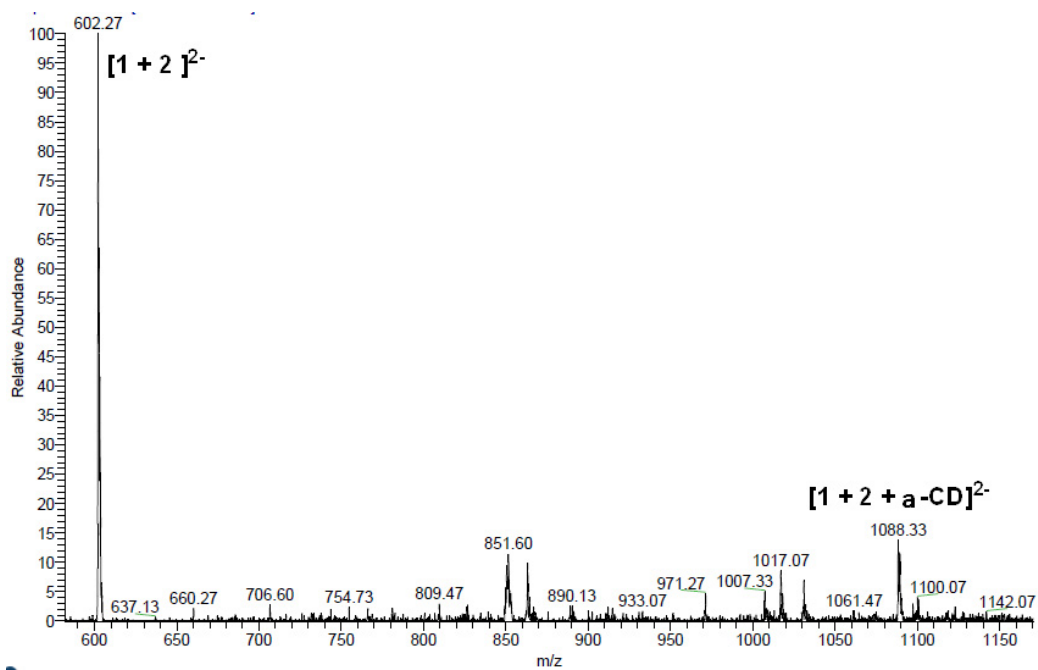

**Fig. S13.** ESI-MS spectrum of  $[3]\text{pseudorotaxane } 2\text{C}1 \cdot \alpha\text{-CD}$ . The peak at  $m/z$  602.27 is assigned to  $[1 + 2]^{2-}$ , calcd.: 602.16; the peak at  $m/z$  1088.33 is assigned to  $[1 + 2 + \alpha\text{-CD}]^{2-}$ , calcd.: 1088.32.

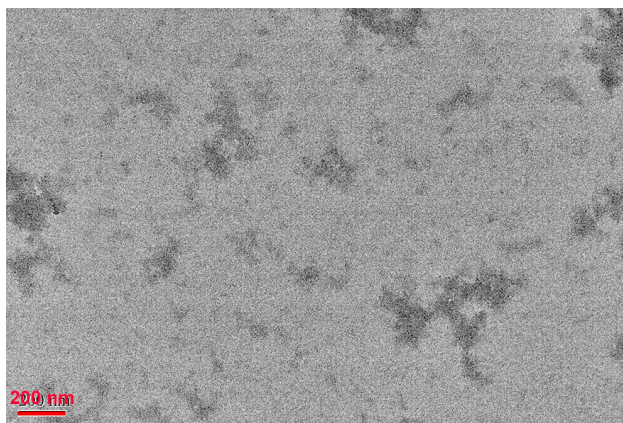

**Fig. S14.** TEM image of [2]pseudorotaxane **2C1** aggregates in the presence of excess  $\alpha$ -CD,  $[1] = [2] = 0.1$  mM,  $[\alpha\text{-CD}] = 0.5$  mM.

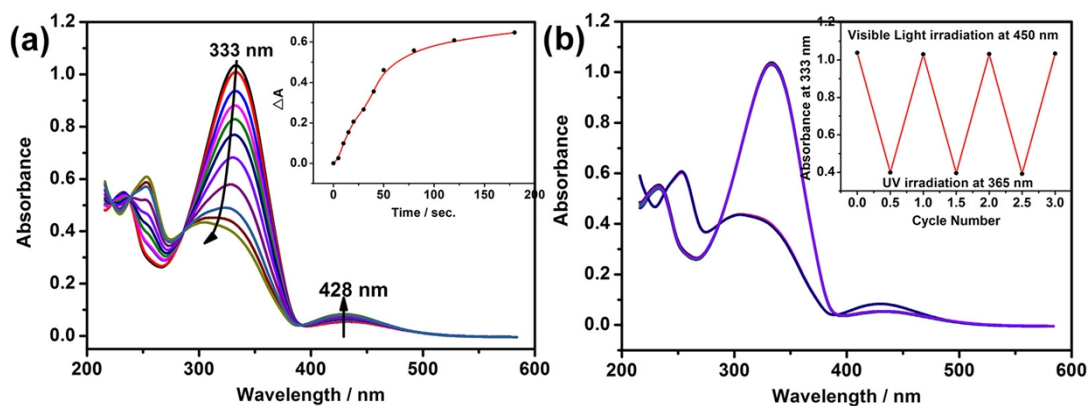

**Fig. S15.** (a) Absorption spectra of **3C** $\alpha$ -CD in water after UV irradiation at 365 nm, Inset: Absorbance changes at 333 nm versus irradiation time. (b) Cycling of the photo-mediated *trans* and *cis* isomerization of **3C** $\alpha$ -CD ( $[3] = [\alpha\text{-CD}] = 0.05$  mM) by alternate irradiation with UV and visible light at 25 °C.

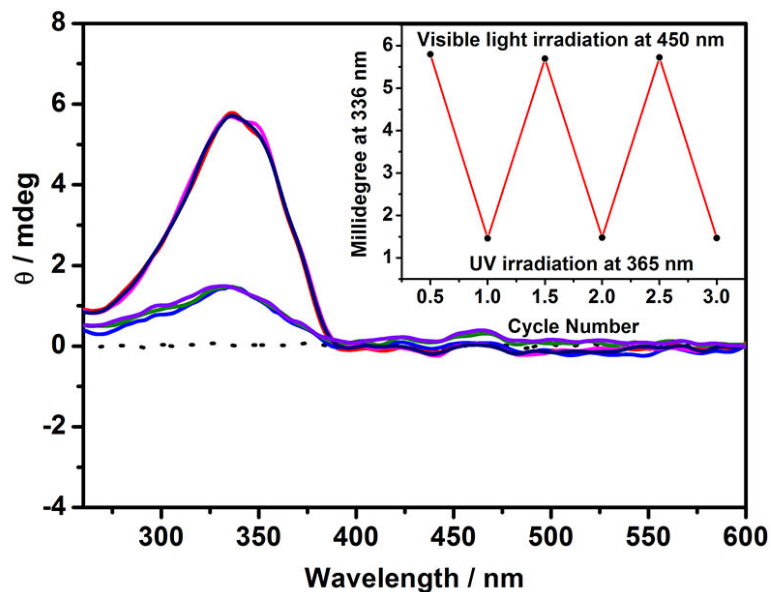

**Fig. S16.** Circular dichroism changes of mixture solution of **3** +  $\alpha$ -CD upon alternate irradiation with UV and visible light. Inset: Cycling of the photo-mediated *trans* and *cis* isomerization of **3** in the mixture ( $[3] = [\alpha\text{-CD}] = 0.1 \text{ mM}$ ,  $25 \text{ }^\circ\text{C}$ , respectively).

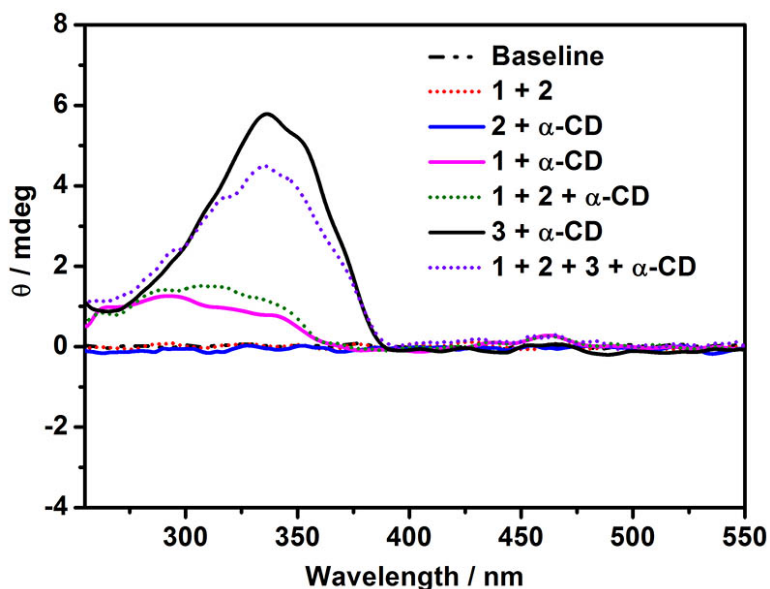

**Fig. S17.** Circular dichroism spectra of different components of **1** + **2**, **2** +  $\alpha$ -CD, **1** +  $\alpha$ -CD, **1** + **2** +  $\alpha$ -CD, **3** +  $\alpha$ -CD and four-components mixture of **1** + **2** +  $\alpha$ -CD + **3**, ( $[1] = [2] = [\alpha\text{-CD}] = 0.1 \text{ mM}$ ,  $[3] = 0.5 \text{ mM}$ ,  $25 \text{ }^\circ\text{C}$ , respectively).

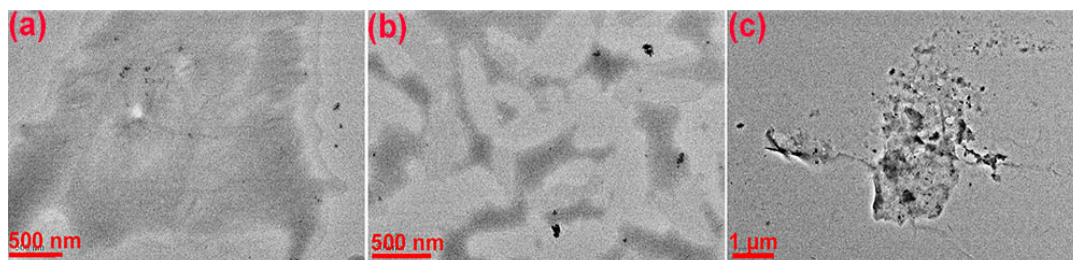

**Fig. S18.** TEM images of (a)  $\alpha$ -CD + **3**, (b) **1** +  $\alpha$ -CD + **3**, (c) **1** +  $\alpha$ -CD. [**1**] = 0.1 mM, [ $\alpha$ -CD] = 0.2 mM, [**3**] = 0.3 mM, respectively).

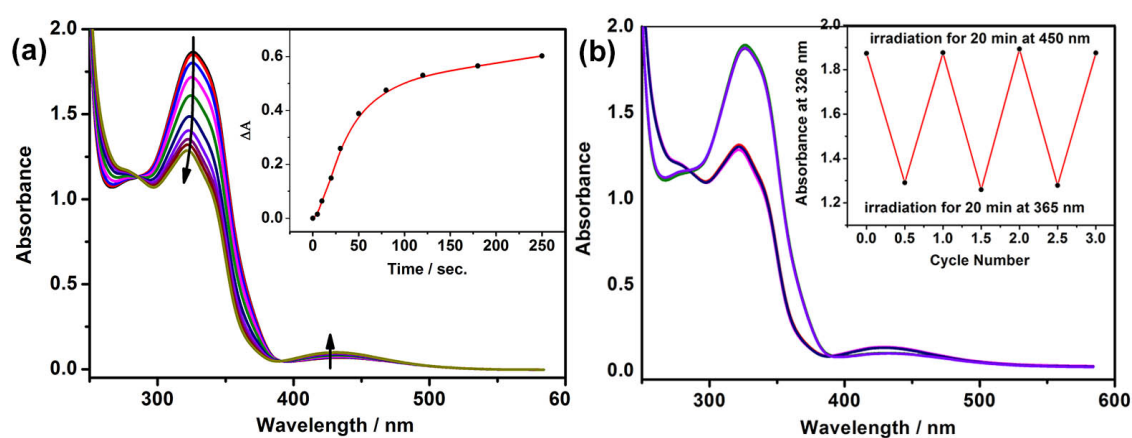

**Fig. S19.** (a) Absorption spectra of a four-components mixture of [**3**]pseudorotaxane  $2\subset 1\cdot\alpha$ -CD + **3** after UV irradiation at 365 nm, Inset: Absorbance changes at 326 nm versus irradiation time. (b) Cycling of the photo-mediated *trans* and *cis* isomerization of the quaternary mixture ([**1**] = [ $\alpha$ -CD] = 0.05 mM) by alternate irradiation with UV and visible light at 25 °C, ([**1**] = [**2**] = [ $\alpha$ -CD] = [**3**] = 0.05 mM, respectively).

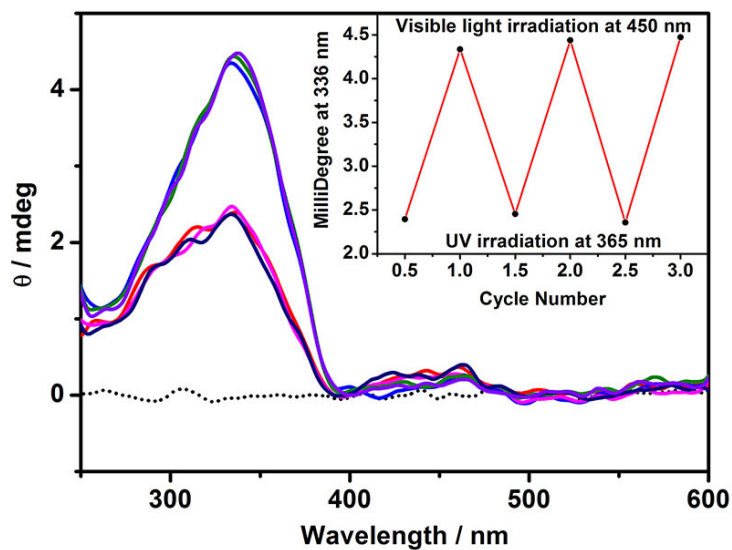

**Fig. S20.** Circular dichroism changes of the four-components mixture of [3]pseudorotaxane **2**⊂**1**· $\alpha$ -CD + **3** upon alternate irradiation with UV and visible light. Inset: Cycling of the photo-mediated *trans* and *cis* isomerization of **3** in the quaternary mixture ( $[\mathbf{1}] = [\mathbf{2}] = [\alpha\text{-CD}] = 0.1 \text{ mM}$ ,  $[\mathbf{3}] = 0.5 \text{ mM}$ ,  $25 \text{ }^\circ\text{C}$ , respectively).

Generally, azobenzene isomerizes to predominantly *trans* and *cis* forms under visible (Vis) and ultraviolet (UV) light, respectively.<sup>4</sup> According to previous reports,<sup>5</sup> we can conclude that the photoisomerization of azophenyl unit is a crucial factor to govern the formation and dissociation of inclusion complex between azobenzene and  $\alpha$ -CD. The  $^1\text{H}$  NMR of **1** + **2** + **3** +  $\alpha$ -CD after UV irradiation in Fig. 3f (in the text), the Fig. S17, Fig. S19 & S20 jointly indicate the reversibility of the azobenzene photoisomerization in four-components solution, along with the transfer of  $\alpha$ -CD from **3**⊂ $\alpha$ -CD to amphiphilic [2]pseudorotaxane **2**⊂**1**. As a result, owing to the formation and dissociation of inclusion complex **3**⊂ $\alpha$ -CD, a reversible conformational change in the transition from amphiphilic [2]pseudorotaxane **2**⊂**1** to water-soluble

[3]pseudorotaxane 2 $\subset$ 1 $\cdot$  $\alpha$ -CD can be operated by the azobenzene photoisomerization. Combining these spectroscopic, NMR (Fig. 3f) of four-components system after UV irradiation and microscopic investigation results, we can speculate the reversibility of the assembly and disassembly processes was driven by the azobenzene photoisomerization in four-components solution.

### References:

- 
- [1] L. Chen, H. Zhang and Y. Liu, *J. Org. Chem.*, 2012, **77**, 9766.  
[2] Y. Lei, *J. Phys. Chem.*, 1991, **95**, 7918.  
[3] D. Liu, Y. Xie, H. Shao and X. Jiang, *Angew. Chem. Int. Ed.* 2009, **48**, 4406.  
[4] H. M. D. Bandarab and S. C. Burdette, *Chem. Soc. Rev.*, 2012, **41**, 1809.  
[5] (a) X. Liao, G. Chen, X. Liu, W. Chen, F. Chen and M. Jiang, *Angew. Chem. Int. Ed.*, 2010, **49**, 4409. (b) X. Ma, Q. Wang, D. Qu, Y. Xu, F. Ji and H. Tian, *Adv. Funct. Mater.* 2007, **17**, 829. (c) S. K. M. Nalluri and B. J. Ravoo, *Angew. Chem. Int. Ed.*, 2010, **49**, 5371. (d) I. Tomatsu, A. Hashidzume and Akira Harada, *J. Am. Chem. Soc.*, 2006, **128**, 2226.
